# Supplementary material for: Incidence and Risk Factors for Wound Revision after Surgical Treatment of Spinal Metastasis: A National Population-Based Study in South Korea
Source: MDPI journal article supplement (doi:10.3390/healthcare11222962), 2023-11-15
Supplement: s1 [file s1]

## Supplement.

**Table S1. Korea Informative Classification of Diseases procedural codes of surgical treatment**

| <b>Surgery</b>         | <b>Korea Informative Classification of Diseases procedural codes</b>      |
|------------------------|---------------------------------------------------------------------------|
| <b>Corpectomy</b>      | N0450-N0453, 0464-0466, 2461-2466 S4704, 4706, 4708                       |
| <b>Instrumentation</b> | N0461, 0462, 0463, 0467-0470, 1460, 1466, 1469, 2467-2470                 |
| <b>Decompression</b>   | N1491, 1492, 1493, 1497, 1498, 1499, N2497, 2498, 2499, S4705, 4707, 4709 |
| <b>Vertebroplasty</b>  | N0471, N0472, N0473, N0474                                                |

**Table S2. ICD-10 codes for the Charlson comorbidity index**

| <b>Disease</b>                               | <b>ICD-10 codes</b>                                                                                                                                                           |
|----------------------------------------------|-------------------------------------------------------------------------------------------------------------------------------------------------------------------------------|
| <b>Myocardial infarction</b>                 | I21.x, I22.x, I25.2                                                                                                                                                           |
| <b>Congestive heart failure</b>              | I09.9, I11.0, I13.0, I13.2, I25.5, I42.0, I42.5 - I42.9, I43.x, I50.x, P29.0                                                                                                  |
| <b>Peripheral vascular disease</b>           | I70.x, I71.x, I73.1, I73.8, I73.9, I77.1, I79.0, I79.2, K55.1, K55.8, K55.9, Z95.8, Z95.9                                                                                     |
| <b>Cerebrovascular disease</b>               | G45.x, G46.x, H34.0, I60.x - I69.x                                                                                                                                            |
| <b>Dementia</b>                              | F00.x - F03.x, F05.1, G30.x, G31.1                                                                                                                                            |
| <b>Chronic pulmonary disease</b>             | I27.8, I27.9, J40.x - J47.x, J60.x - J67.x, J68.4, J70.1, J70.3                                                                                                               |
| <b>Rheumatic disease</b>                     | M05.x, M06.x, M31.5, M32.x - M34.x, M35.1, M35.3, M36.0                                                                                                                       |
| <b>Peptic ulcer disease</b>                  | K25.x - K28.x                                                                                                                                                                 |
| <b>Mild liver disease</b>                    | B18.x, K70.0 - K70.3, K70.9, K71.3 - K71.5, K71.7, K73.x, K74.x, K76.0, K76.2 - K76.4, K76.8, K76.9, Z94.4                                                                    |
| <b>Diabetes without chronic complication</b> | E10.0, E10.1, E10.6, E10.8, E10.9, E11.0, E11.1, E11.6, E11.8, E11.9, E12.0, E12.1, E12.6, E12.8, E12.9, E13.0, E13.1, E13.6, E13.8, E13.9, E14.0, E14.1, E14.6, E14.8, E14.9 |
| <b>Diabetes with chronic complication</b>    | E10.2 - E10.5, E10.7, E11.2 - E11.5, E11.7, E12.2 - E12.5, E12.7, E13.2 - E13.5, E13.7, E14.2 - E14.5, E14.7                                                                  |
| <b>Hemiplegia or paraplegia</b>              | G04.1, G11.4, G80.1, G80.2, G81.x, G82.x, G83.0 - G83.4, G83.9                                                                                                                |
| <b>Renal disease</b>                         | I12.0, I13.1, N03.2 - N03.7, N05.2 - N05.7, N18.x, N19.x, N25.0, Z49.0 - Z49.2, Z94.0, Z99.2                                                                                  |

|                                         |                                                                                |
|-----------------------------------------|--------------------------------------------------------------------------------|
| <b>Moderate or severe liver disease</b> | I85.0, I85.9, I86.4, I98.2, K70.4, K71.1, K72.1, K72.9, K76.5, K76.6,<br>K76.7 |
| <b>AIDS/HIV</b>                         | B20.x - B22.x, B24.x                                                           |
| <b>Lung cancer</b>                      | C34                                                                            |
| <b>Liver cancer</b>                     | C22                                                                            |
| <b>Breast cancer</b>                    | C50                                                                            |
| <b>Colorectal cancer</b>                | C18–20                                                                         |
| <b>Stomach cancer</b>                   | C16                                                                            |
| <b>Prostate cancer</b>                  | C61                                                                            |
| <b>Multiple myeloma</b>                 | C90                                                                            |
| <b>Other</b>                            | C51–57, C60–68                                                                 |

---
